# Supplementary material
Source: PubMed Central journal article supplement (PMC7560205)

**Figure 1C**

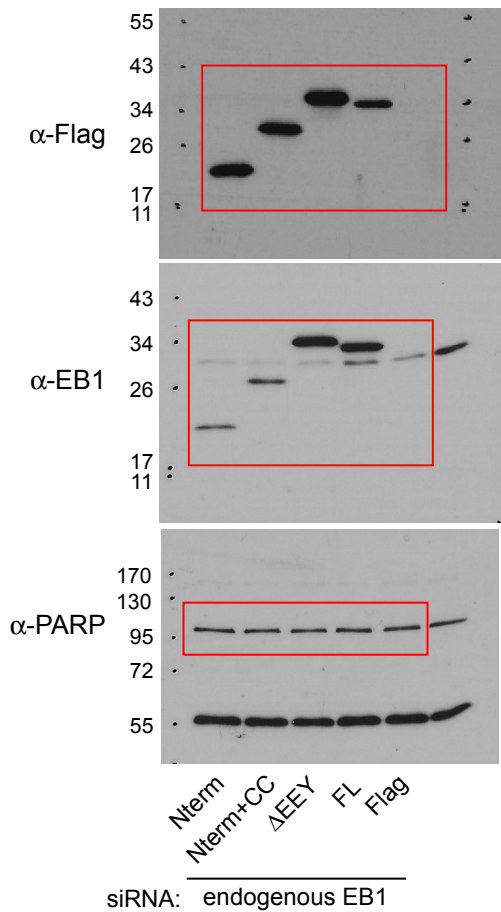

**Figure 1D**

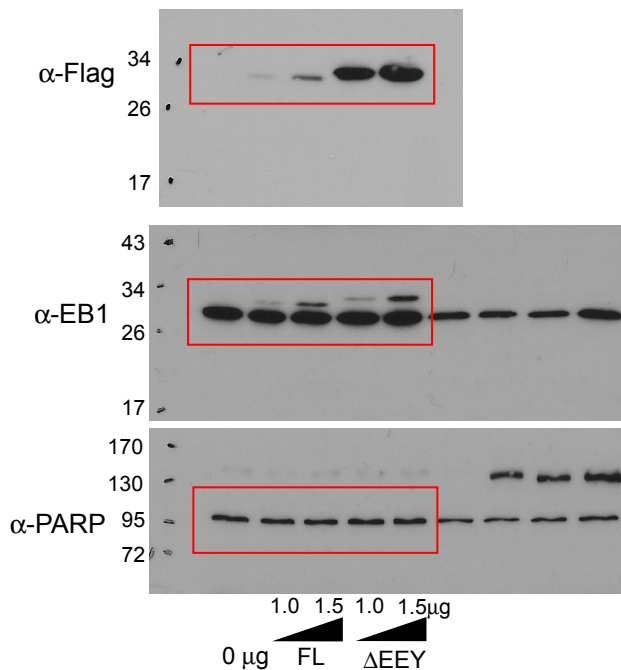

**Figure 1E**

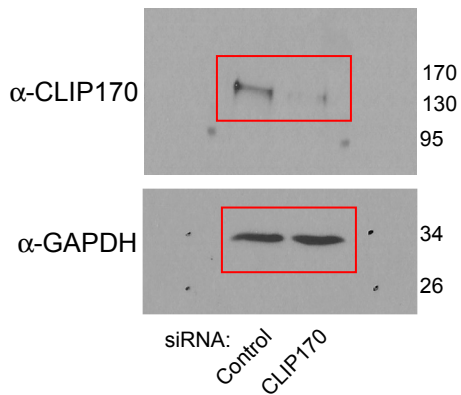

Supplement: EMBJ-39-e104870-s005.pdf [file EMBJ-39-e104870-s005.pdf]

Figure 2C

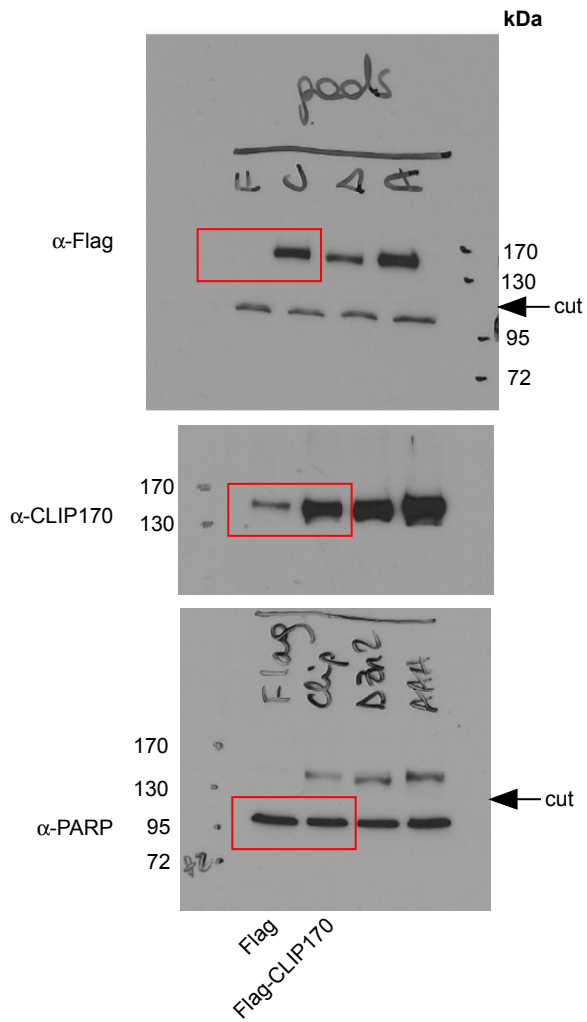

Supplement: EMBJ-39-e104870-s006.pdf [file EMBJ-39-e104870-s006.pdf]

**Figure 3A**

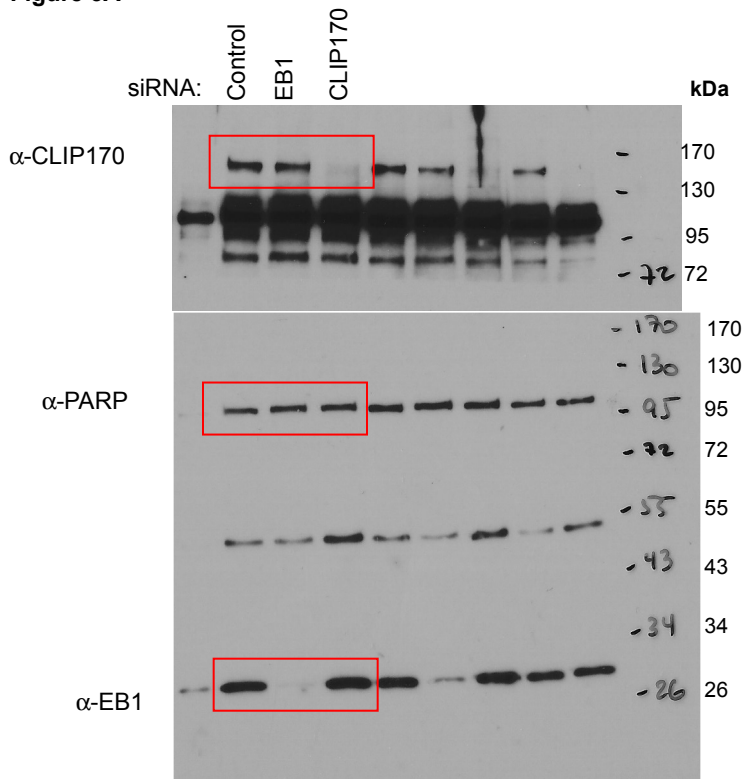

Supplement: EMBJ-39-e104870-s007.pdf [file EMBJ-39-e104870-s007.pdf]

**Figure 4B**

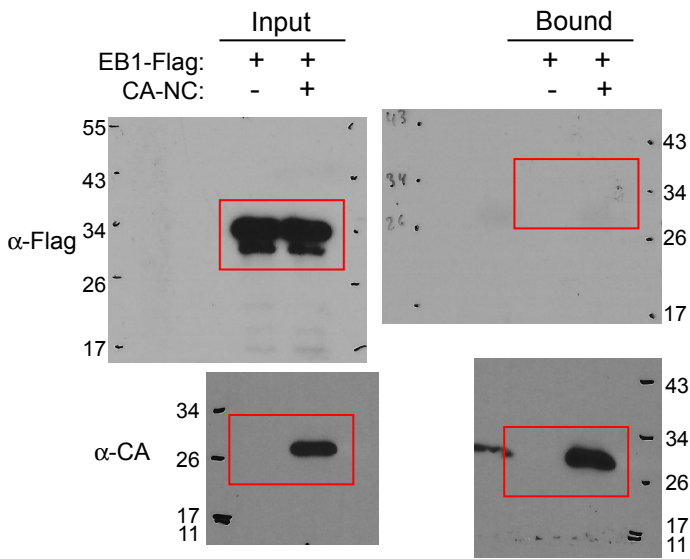

**Figure 4C**

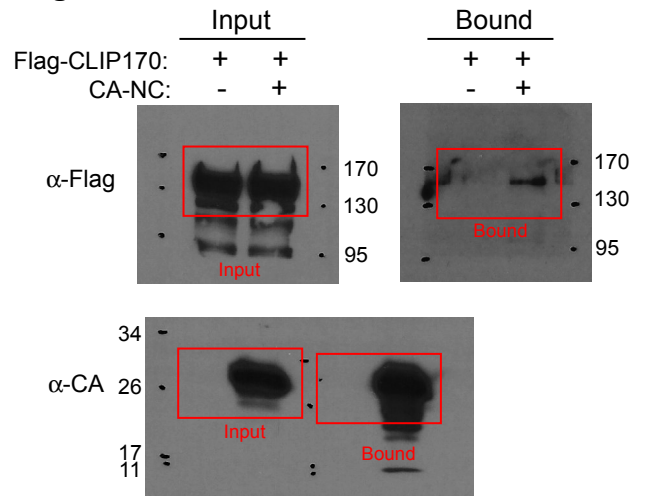

**Figure 4E**

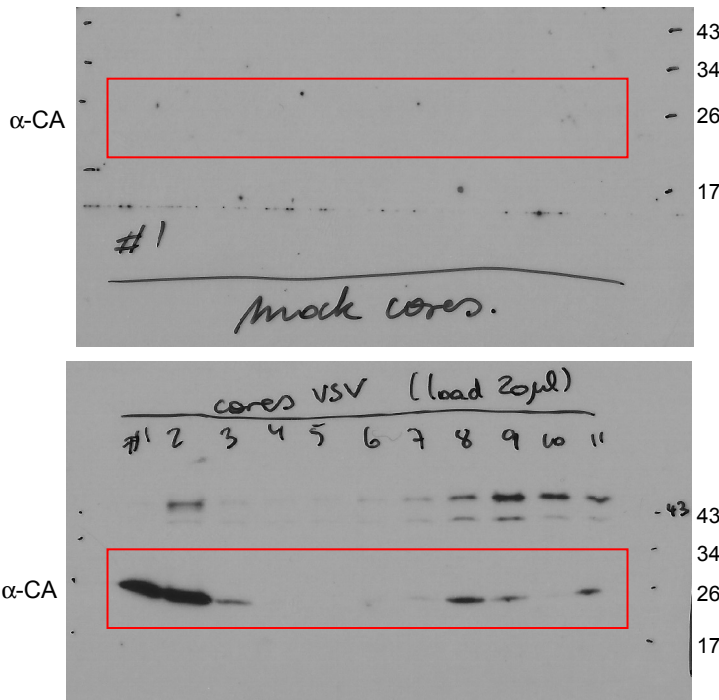

**Figure 4F**

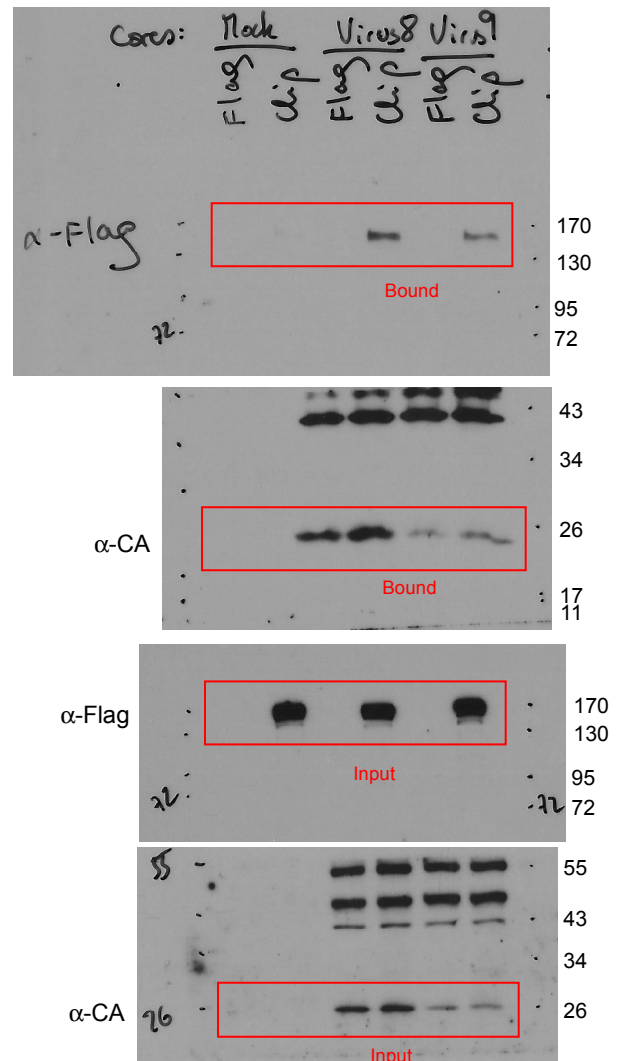

Supplement: EMBJ-39-e104870-s008.pdf [file EMBJ-39-e104870-s008.pdf]

**Figure 5B**

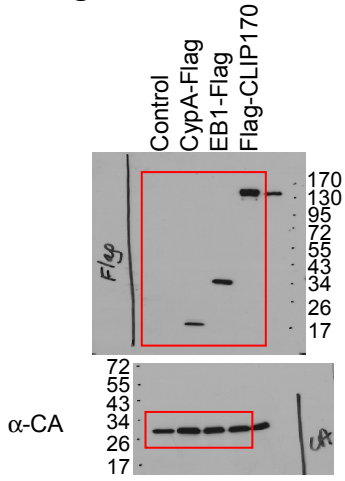

**Figure 5D**

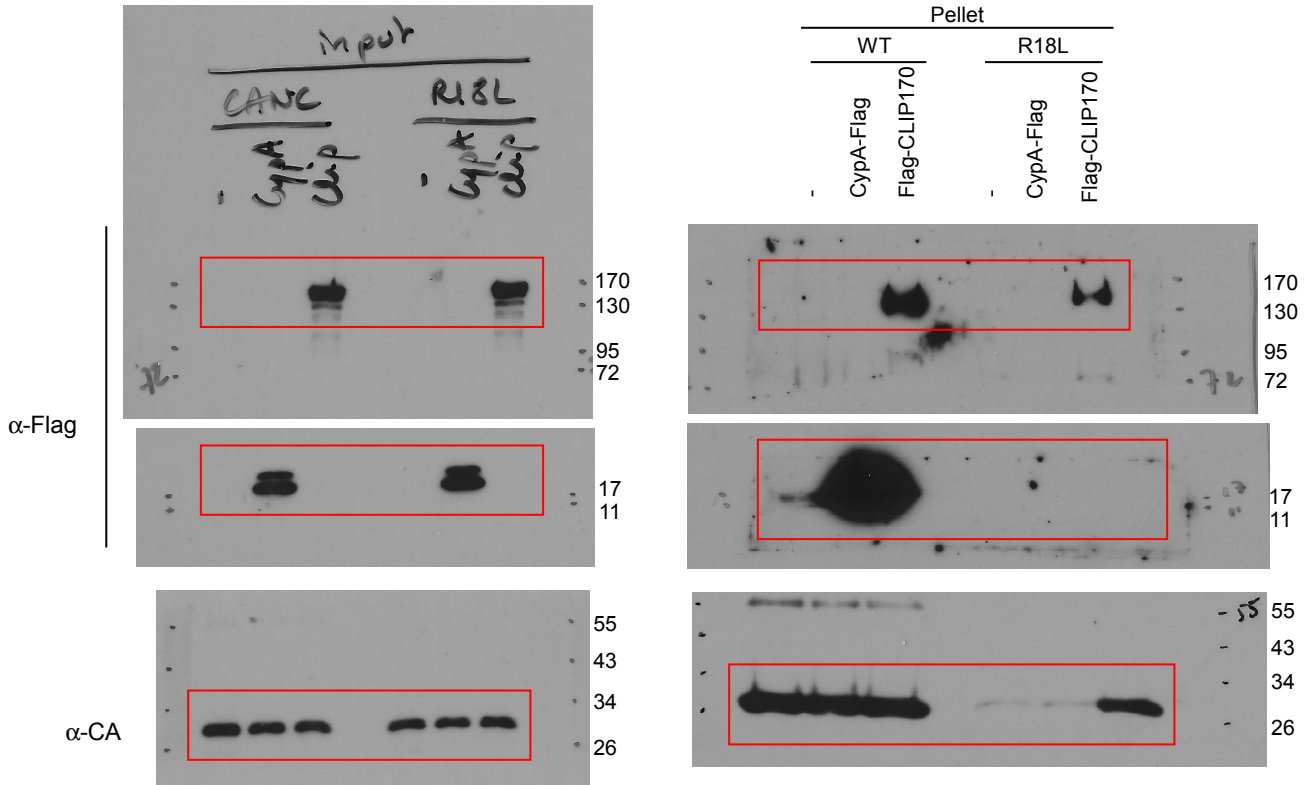

Supplement: EMBJ-39-e104870-s009.pdf [file EMBJ-39-e104870-s009.pdf]

**Figure 6C**

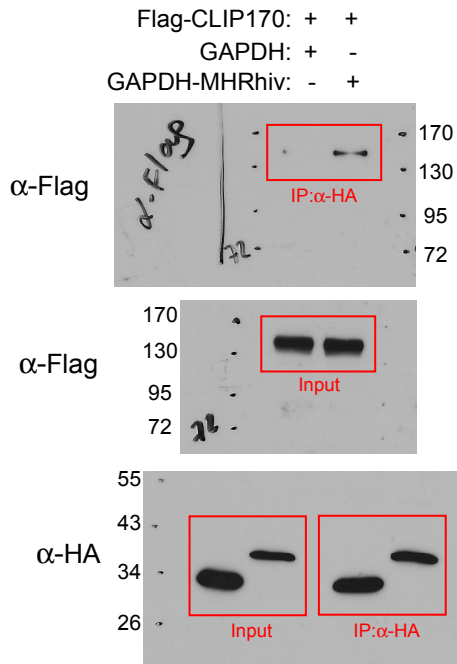

**Figure 6D**

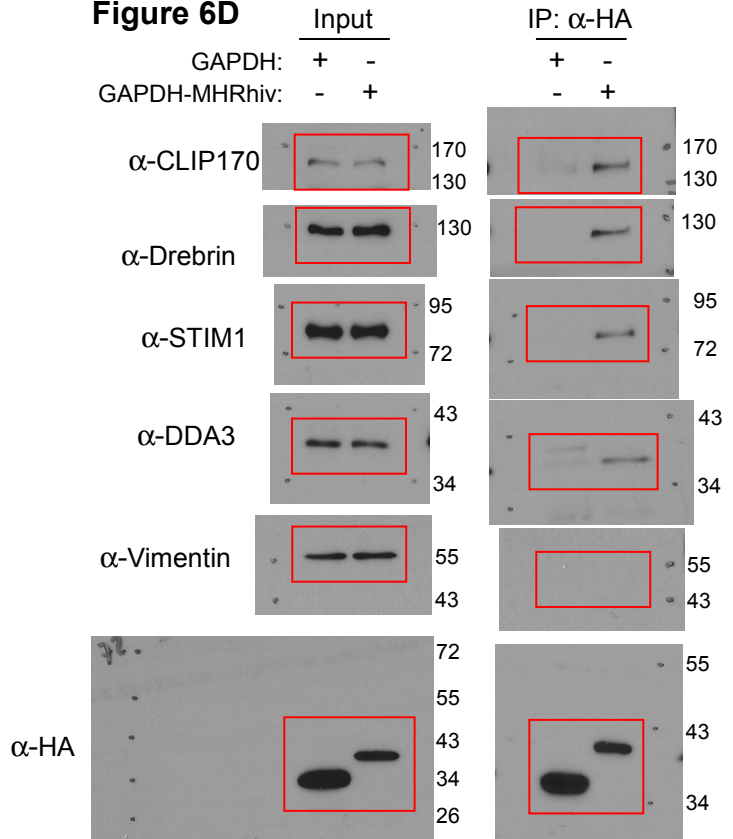

**Figure 6E**

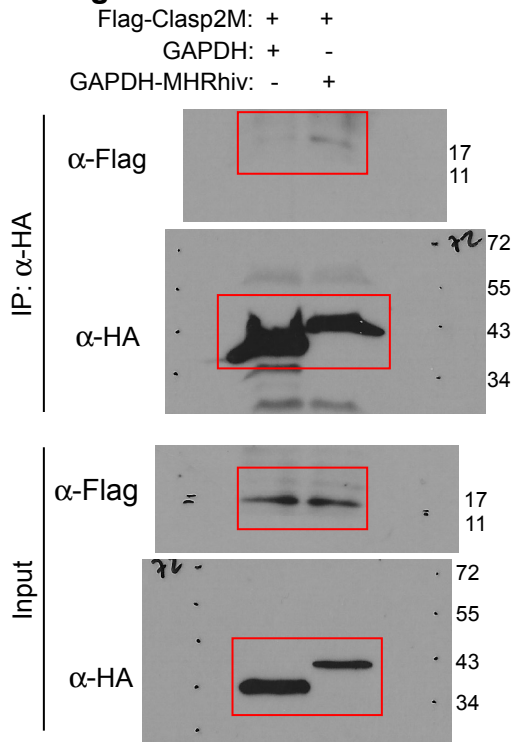

**Figure 6F**

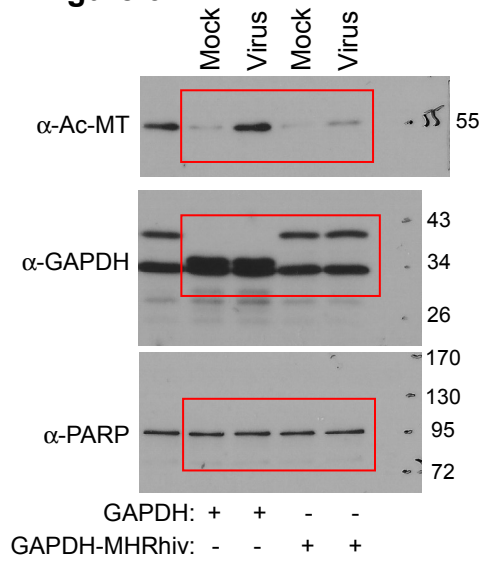

**Figure 6H**

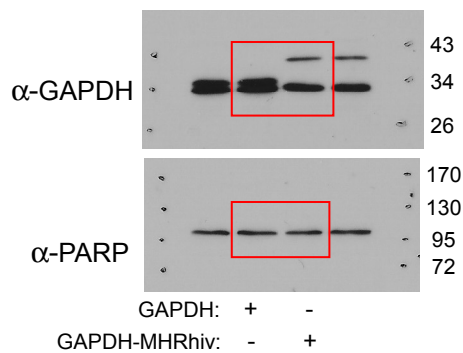

Supplement: EMBJ-39-e104870-s010.pdf [file EMBJ-39-e104870-s010.pdf]

**Figure 7C**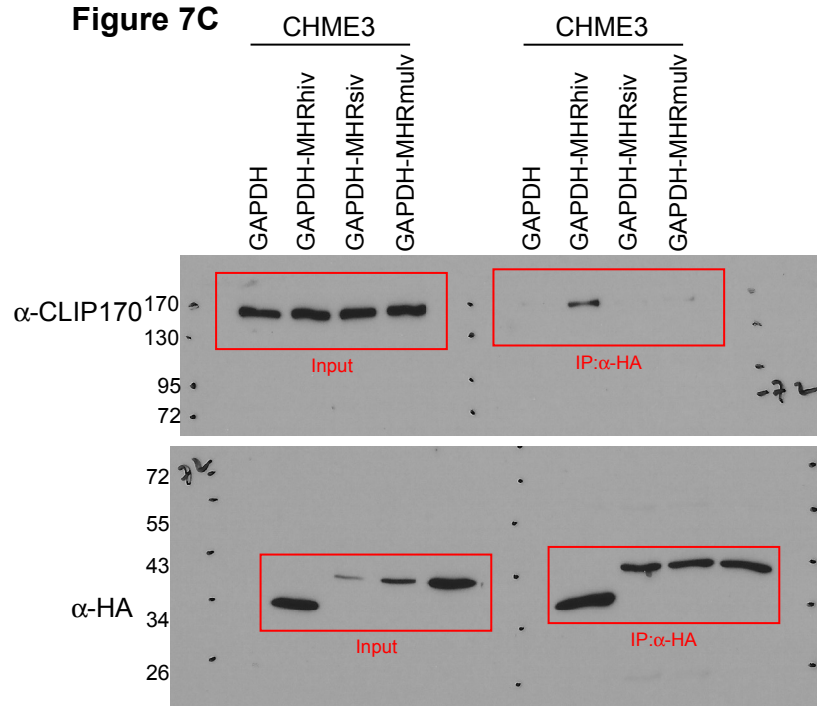**Figure 7D**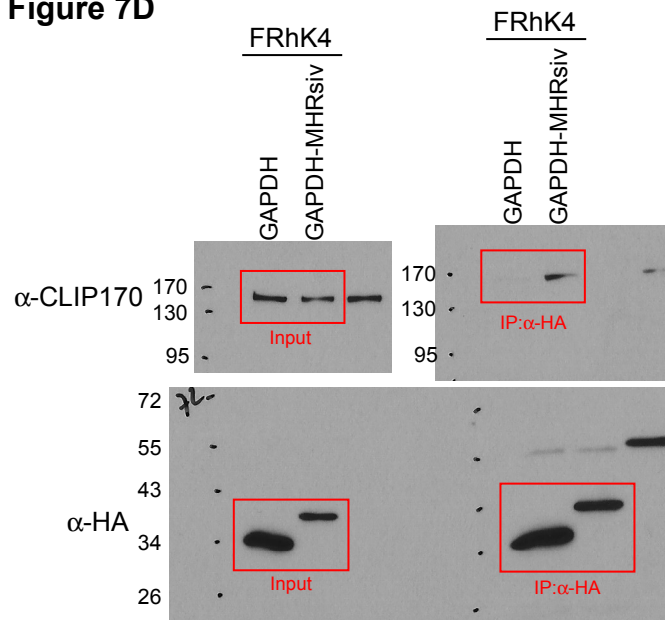**Figure 7E**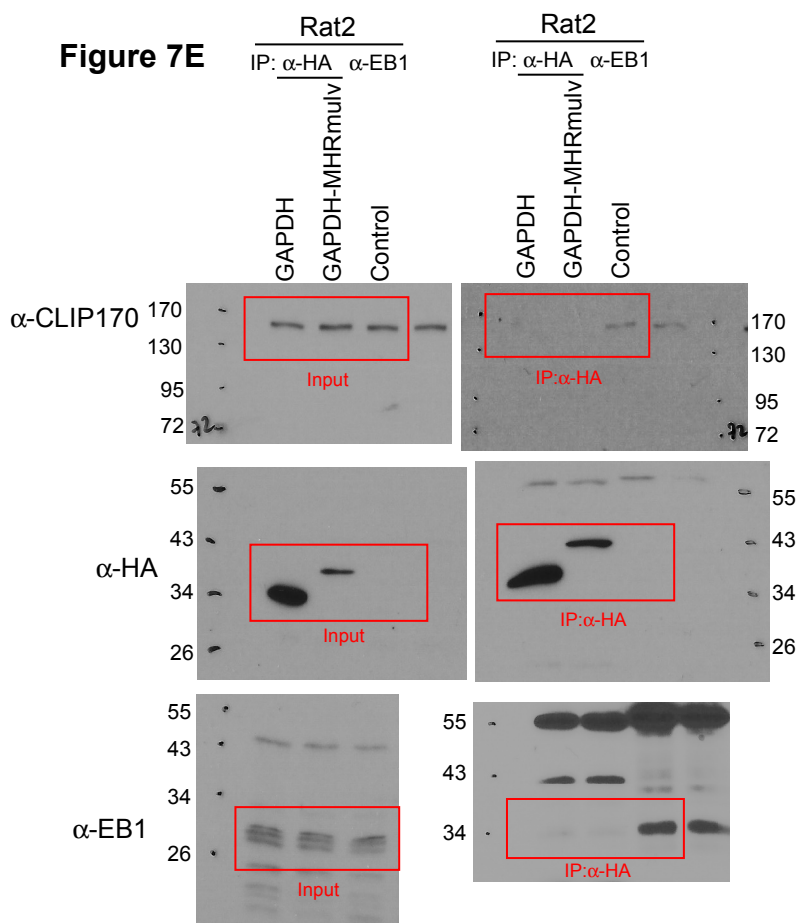**Figure 7H**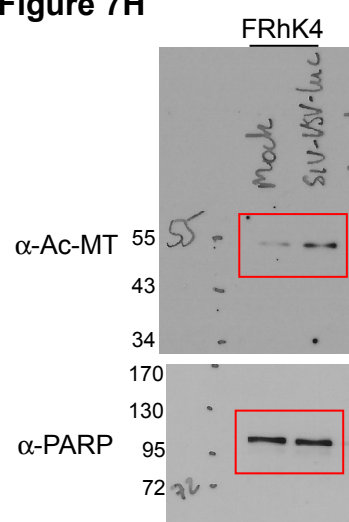**Figure 7I**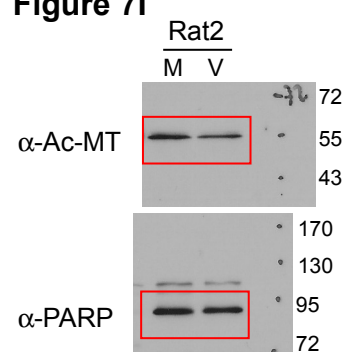**Figure 7J**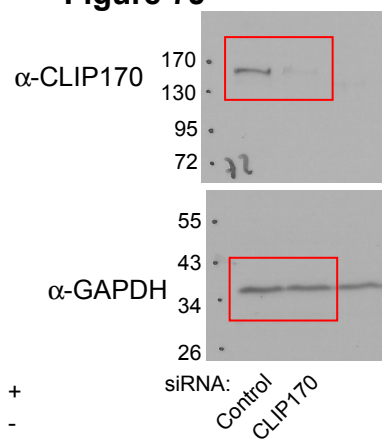**Figure 7K**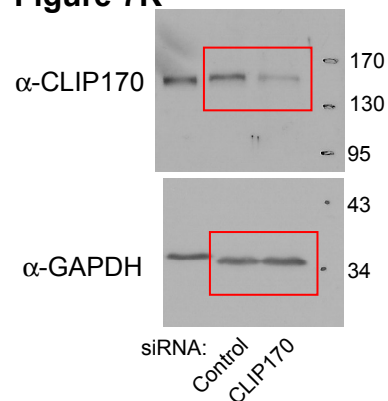**Figure 7L**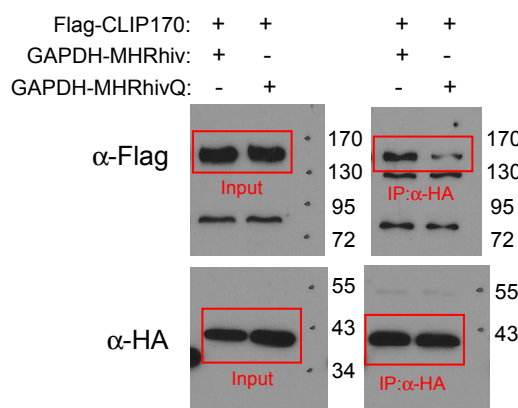

Supplement: EMBJ-39-e104870-s011.pdf [file EMBJ-39-e104870-s011.pdf]
